# Supplementary material
Source: MDPI journal article supplement (https://www.mdpi.com/2225-1146/6/2/20)
Supplement: s1 [file s1]

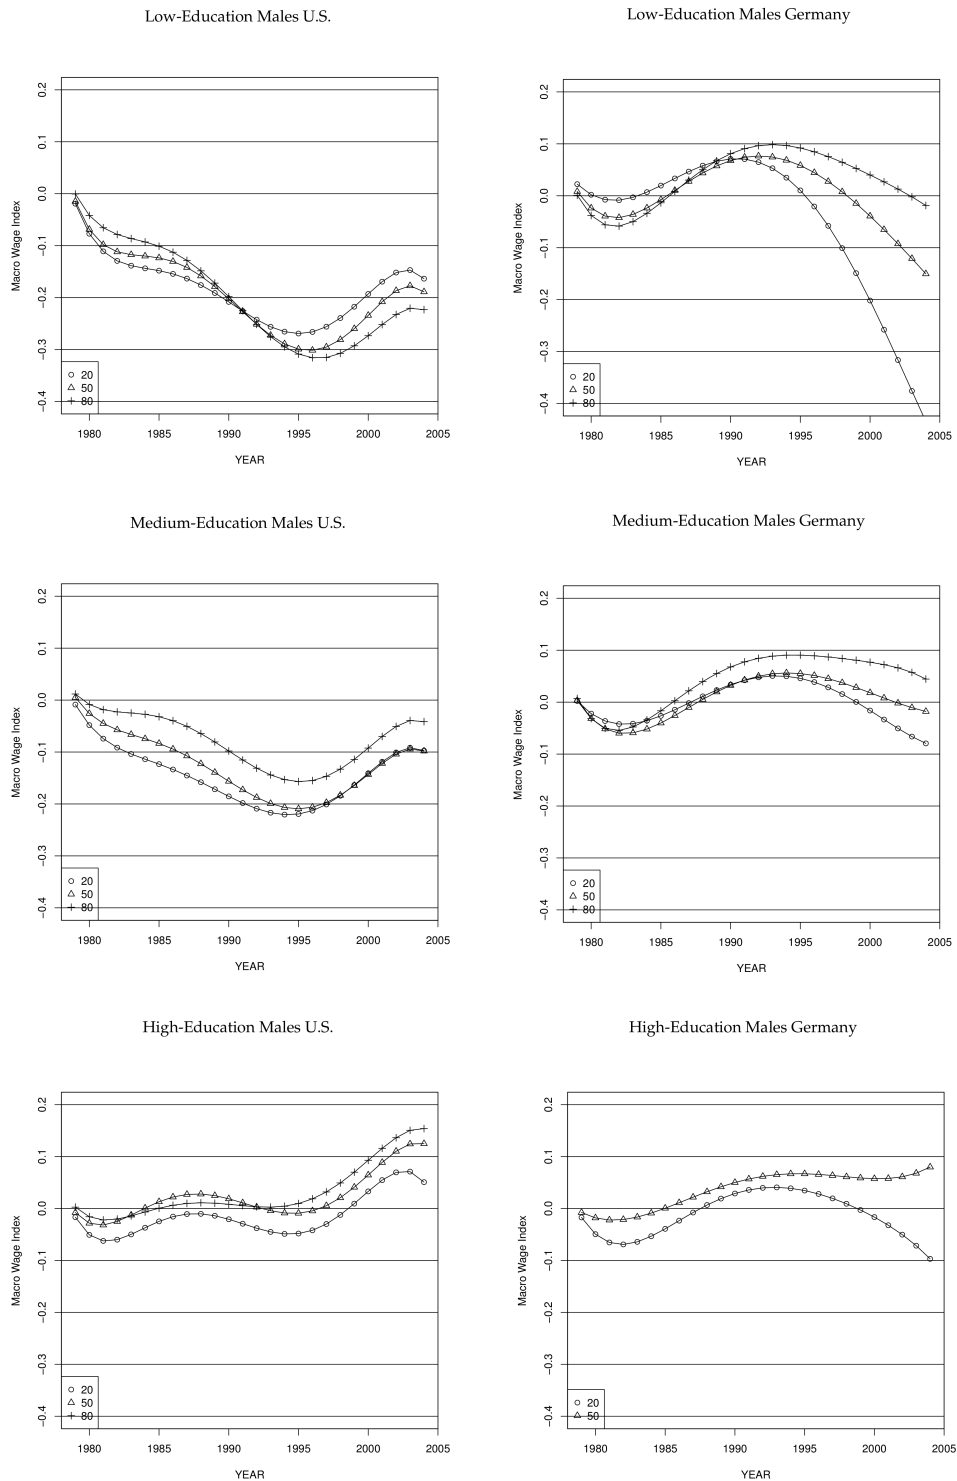

**Figure S1.** Cumulated growth of Entry Wages: (left) U.S.; and (right) Germany.

Differences in Time-Trends, Low-Education Males U.S.

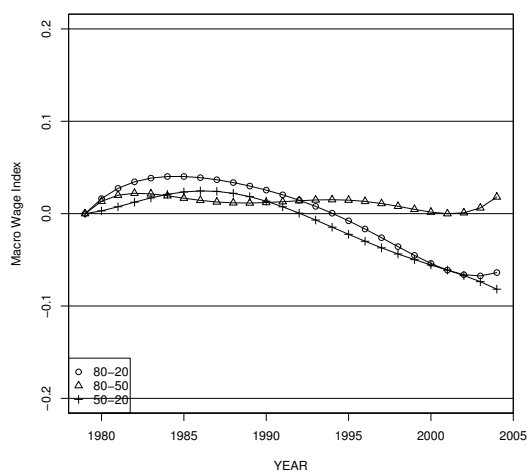

Differences in Time-Trends, Low-Education Males Germany.

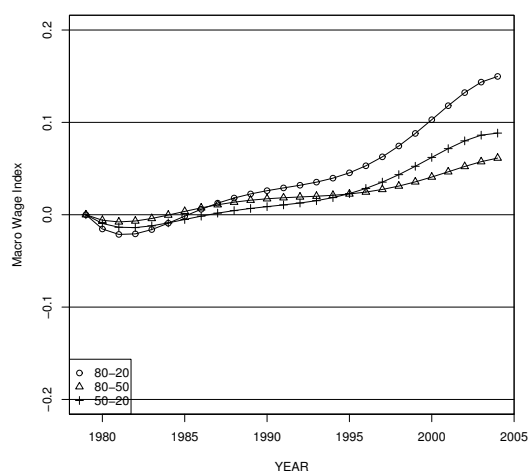

Differences in Time-Trends, Medium-Education Males U.S.

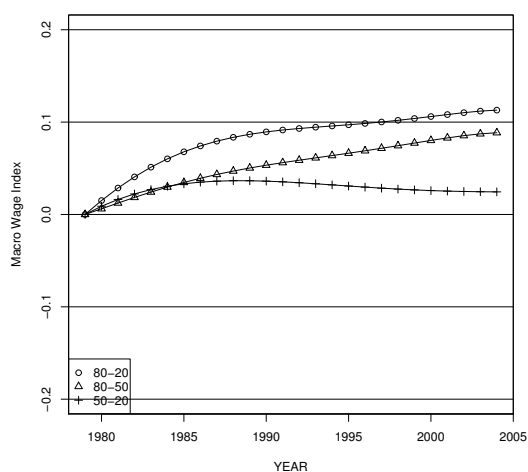

Differences in Time-Trends, Medium-Education Males Germany.

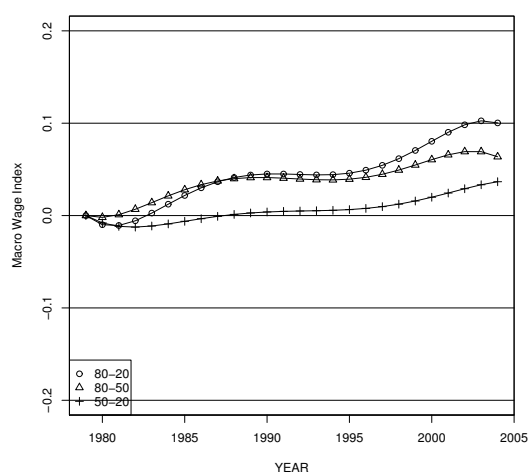

Differences in Time-Trends, High-Education Males U.S.

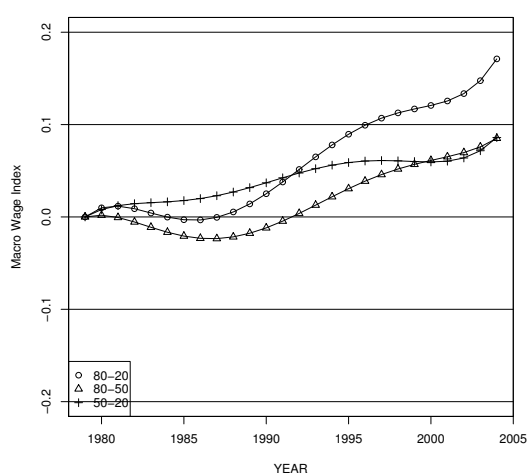

Differences in Time-Trends, High-Education Males Germany

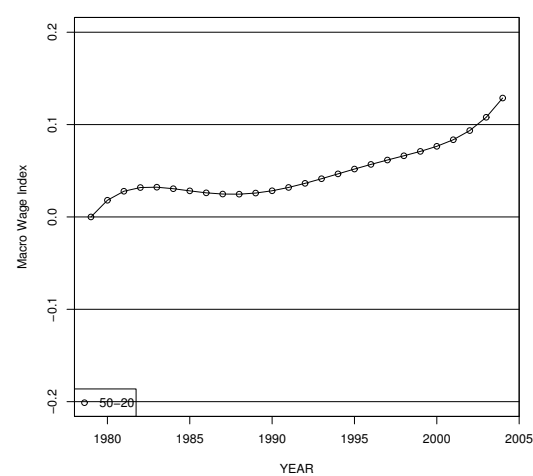**Figure S2.** Differences in Time-Trends 1979–2004 for males: (left) U.S.; and (right) Germany.

**Table S1.** Model specification and results for full-time working men, U.S.

| Education Group                                                                                                                       | Low  |      |      | Medium |      |       | High |       |      |
|---------------------------------------------------------------------------------------------------------------------------------------|------|------|------|--------|------|-------|------|-------|------|
| Quantile                                                                                                                              | 0.2  | 0.5  | 0.8  | 0.2    | 0.5  | 0.8   | 0.2  | 0.5   | 0.8  |
| Model with $H_{UI} : \rho_j = 0, j = 1, \dots, 4$ , and cohort effects before and after 1979                                          | n.r. | n.r. | n.r. | n.r.*  | n.r. | n.r.* | n.r. | n.r.  | n.r. |
| Model with $H_{UI} : \rho_j = 0, j = 1, \dots, 4$ , and no cohort effects $\gamma_{a2} = \gamma_{a3} = \gamma_{b2} = \gamma_{b3} = 0$ | n.r. | n.r. | n.r. | n.r.   | n.r. | n.r.* | n.r. | n.r.* | n.r. |

Notes: Based on specification 12 [Model 1] in the main text. r. indicates that the specification is rejected. n.r. indicates that the specification is not rejected. n.r. marked models with an asterisk \* are only not rejected at an  $\alpha=0.01$  level, the others also for  $\alpha=0.05$ .

**Table S2.** Model specification and results for full-time working men, Germany.

| Education Group                                                                                                                       | Low  |       |       | Medium |      |      | High |     |     |
|---------------------------------------------------------------------------------------------------------------------------------------|------|-------|-------|--------|------|------|------|-----|-----|
| Quantile                                                                                                                              | 0.2  | 0.5   | 0.8   | 0.2    | 0.5  | 0.8  | 0.2  | 0.5 | 0.8 |
| Model with $H_{UI} : \rho_j = 0, j = 1, \dots, 4$ , and cohort effects before and after 1979                                          | n.r. | n.r.  | n.r.  | n.r.   | n.r. | n.r. | -    | -   | -   |
| Model with $H_{UI} : \rho_j = 0, j = 1, \dots, 4$ , and no cohort effects $\gamma_{a2} = \gamma_{a3} = \gamma_{b2} = \gamma_{b3} = 0$ | n.r. | n.r.* | n.r.* | r.     | r.   | r.   | -    | -   | -   |

Notes: Based on specification 12 [Model 1] in the main text. r. indicates that the specification is rejected. n.r. indicates that the specification is not rejected. n.r. marked models with an asterisk \* are only not rejected at an  $\alpha=0.01$  level, the others also for  $\alpha=0.05$ . We do not perform the tests for high-education workers in Germany because of the high degree of censoring in this group.
